# Supplementary material for: Role of peer support workers in improving patient experience in Tower Hamlets Specialist Addiction Unit
Source: PubMed Central journal article supplement — BMJ Qual Improv Rep. 2016 Nov 7;5(1):u205967.w2458. doi: 10.1136/bmjquality.u205967.w2458 (PMC5128766; doi:10.1136/bmjquality.u205967.w2458), 2016-11-07
Supplement: bmjqir.u205967.w2458supp.pdf [file bmjqir.u205967.w2458supp.pdf]

**PDSA Cycle [1]**

**Aim:** what are you trying to accomplish?

Improve attendance at TH SAU

**Plan:** what will your test be?

To see if facilitating breakfast club by a peer support worker would increase the attendance

**Prediction:** what do you think will happen as a result of your test?

Improved attendance

**Do:** what happened when you carried out your test?

Advertise the change in facilitator

**Study:** how did the results of your test compare with predictions?

Improved numbers gradually, but not to the extent anticipated

**Act:** how will you change your previous test in light of what you have learned?

Try other activities based on feedback from patients

**PDSA Cycle [2]**

**Aim:** what are you trying to accomplish?

Improve attendance at TH SAU

**Plan:** what will your test be?

To see if facilitating other activities by a peer support worker would increase the attendance

**Prediction:** what do you think will happen as a result of your test?

Improved attendance and engagement

**Do:** what happened when you carried out your test?

Advertise new activities

**Study:** how did the results of your test compare with predictions?

Mixed results, with some activities more successful than others

**Act:** how will you change your previous

Find activities to reach 'hard to reach' patients

**PDSA Cycle [3]**

**Aim:** what are you trying to accomplish?

Improve attendance at TH SAU

**Plan:** what will your test be?

To see if having a better music studio with upgraded equipment improves engagement

**Prediction:** what do you think will happen as a result of your test?

Improved attendance and engagement

**Do:** what happened when you carried out your test?

Advertise new studio, observe the numbers

**Study:** how did the results of your test compare with predictions?

Showed improved still satisfaction, less impact on absolute numbers

**Act:** how will you change your previous test in light of what you have learned?

Needs to be advertised more
